# Supplementary material for: Sesquiterpene Lactones and Flavonoids from Psephellus pyrrhoblepharus with Antiproliferative Activity on Human Gynecological Cancer Cell Lines
Source: PubMed Central journal article supplement (PMC6749316; doi:10.3390/molecules24173165), 2019-08-30
Supplement: molecules-24-03165-s001.pdf [file molecules-24-03165-s001.pdf]

## SUPPORTING INFORMATION

### **Sesquiterpene lactones and flavonoids from *Psephellus pyrrhoblepharus* with antiproliferative activity on human gynecological cancer cell lines**

**Pelin Tastan <sup>1</sup>, Zsuzsanna Hajdú <sup>2</sup>, Norbert Kúsz <sup>2</sup>, István Zupkó <sup>3,4</sup>, Izabella Sinka <sup>3</sup>, Bijen Kivcak <sup>1</sup> and Judit Hohmann <sup>2,4\*</sup>**

<sup>1</sup> Department of Pharmacognosy, Faculty of Pharmacy, Ege University, İzmir, Turkey

<sup>2</sup> Institute of Pharmacognosy, Interdisciplinary Excellence Centre, University of Szeged, Szeged, Hungary

<sup>3</sup> Institute of Pharmacodynamics and Biopharmacy, Interdisciplinary Excellence Centre, University of Szeged, Szeged, Hungary

<sup>4</sup> Interdisciplinary Centre of Natural Products, University of Szeged, Szeged, Hungary

\* Correspondence: hohmann@pharm.u-szeged.hu; Tel.: +36-62-545 558

## Content

|                                                                                                                             |   |
|-----------------------------------------------------------------------------------------------------------------------------|---|
| Figure S1. <sup>1</sup> H NMR spectrum of chlorojanerin ( <b>1</b> ) .....                                                  | 3 |
| Figure S2. <sup>1</sup> H NMR spectrum of 19-deoxychlorojanerin ( <b>2</b> ) .....                                          | 3 |
| Figure S3. <sup>1</sup> H NMR spectrum of 15-hydroxyjanerin ( <b>3</b> ) .....                                              | 4 |
| Figure S4. <sup>1</sup> H NMR spectrum of aguerin B ( <b>4</b> ) .....                                                      | 4 |
| Figure S5. <sup>1</sup> H NMR spectrum of cynaropicrin ( <b>5</b> ).....                                                    | 5 |
| Figure S6. <sup>1</sup> H NMR spectrum of eleganin ( <b>6</b> ).....                                                        | 5 |
| Figure S7. <sup>1</sup> H NMR spectrum of apigenin .....                                                                    | 6 |
| Figure S8. <sup>1</sup> H NMR spectrum of 6-methoxyluteolin .....                                                           | 6 |
| Figure S9. <sup>1</sup> H NMR spectrum of jaceosidine .....                                                                 | 7 |
| Figure S10. <sup>1</sup> H NMR spectrum of scopoletin .....                                                                 | 7 |
| Figure S11. Separation of sesquiterpenoids and flavonoids by Sephadex LH-20 gel filtration of fraction C <sub>5</sub> ..... | 8 |
| Figure S12. Separation by gel filtration of fraction D, subfraction II on Sephadex LH-20.....                               | 8 |
| Figure S13. RPC fractionation of fraction D, subfraction II, gel filtration 3+4 .....                                       | 9 |

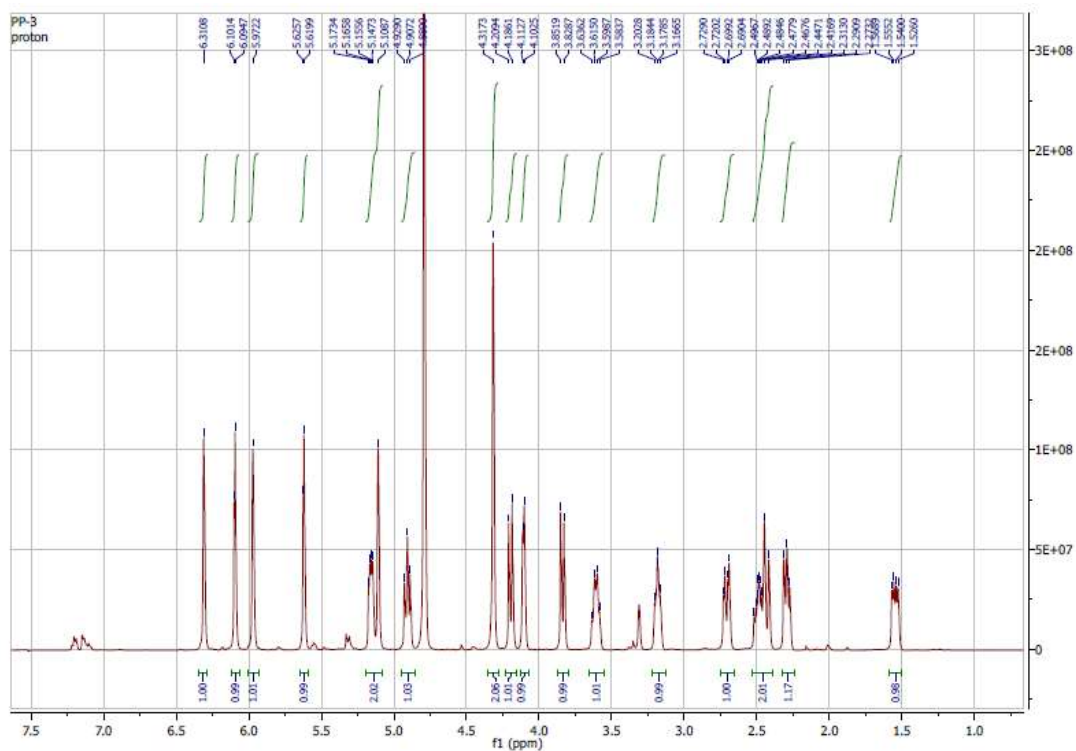

Figure S1.  $^1\text{H}$  NMR spectrum of chlorojanerin (1) (500 MHz,  $\text{MeOH-}d_4$ )

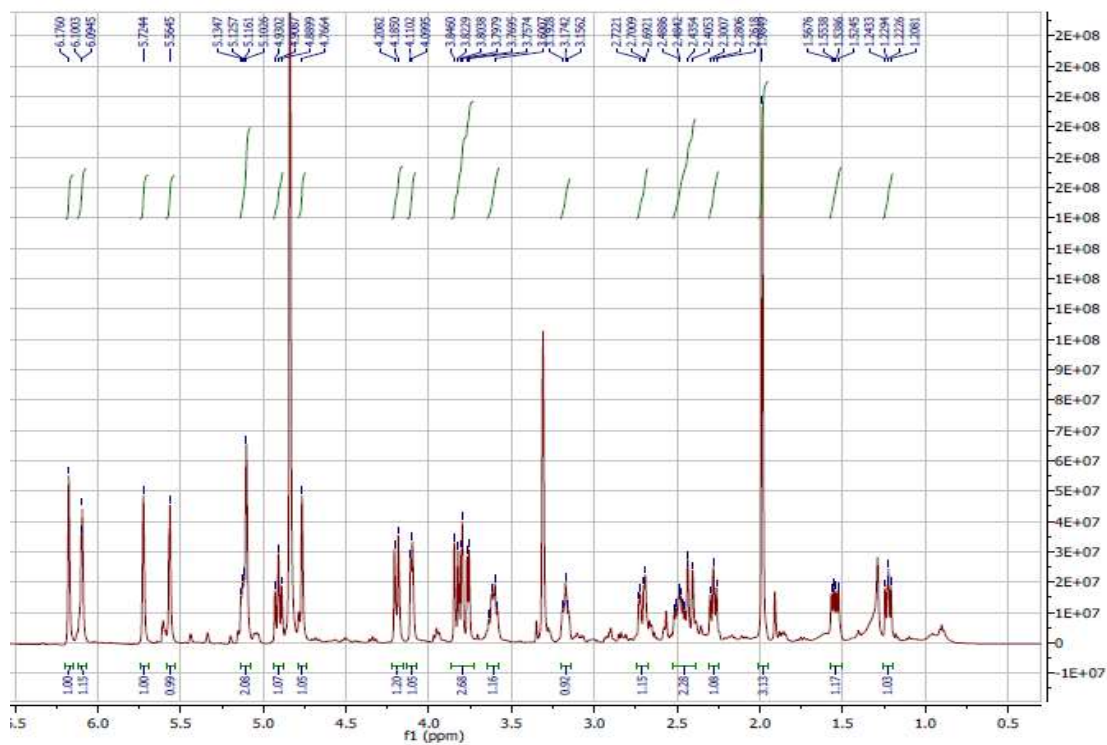

Figure S2.  $^1\text{H}$  NMR spectrum of 19-deoxychlorojanerin (2) (500 MHz,  $\text{MeOH-}d_4$ )

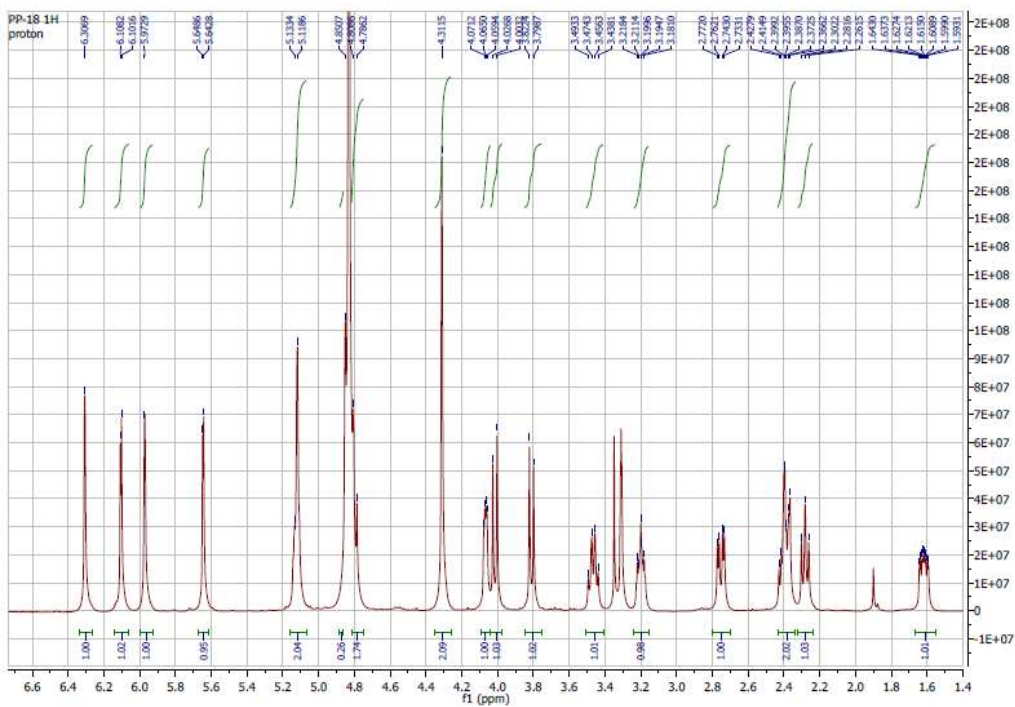

Figure S3.  $^1\text{H}$  NMR spectrum of 15-hydroxyjanerin (**3**) (500 MHz,  $\text{MeOH-}d_4$ )

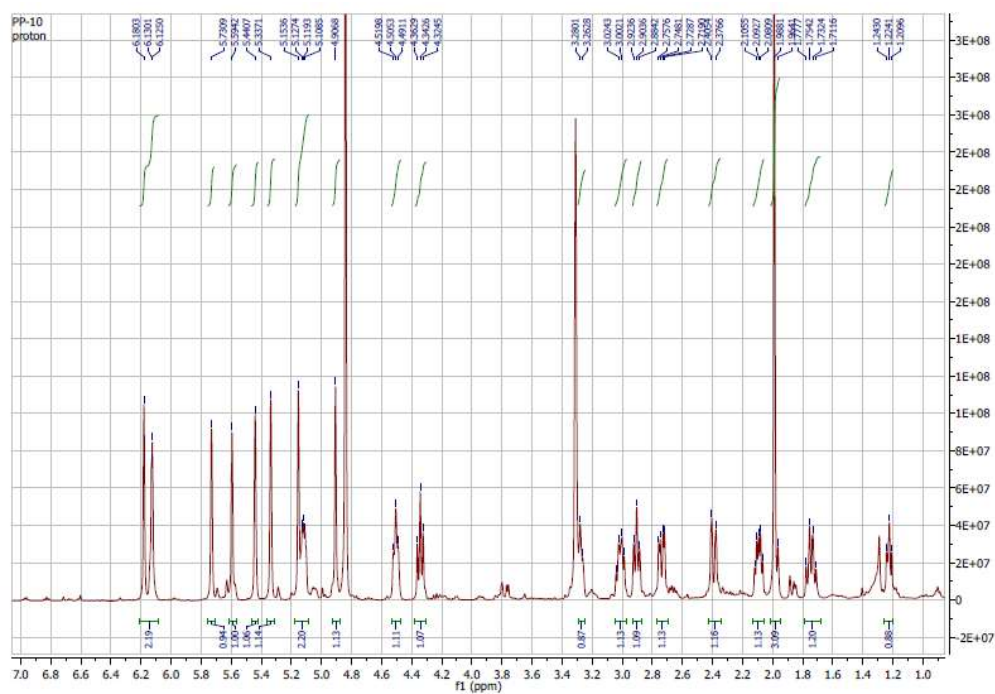

Figure S4.  $^1\text{H}$  NMR spectrum of aguerin B (**4**) (500 MHz,  $\text{MeOH-}d_4$ )

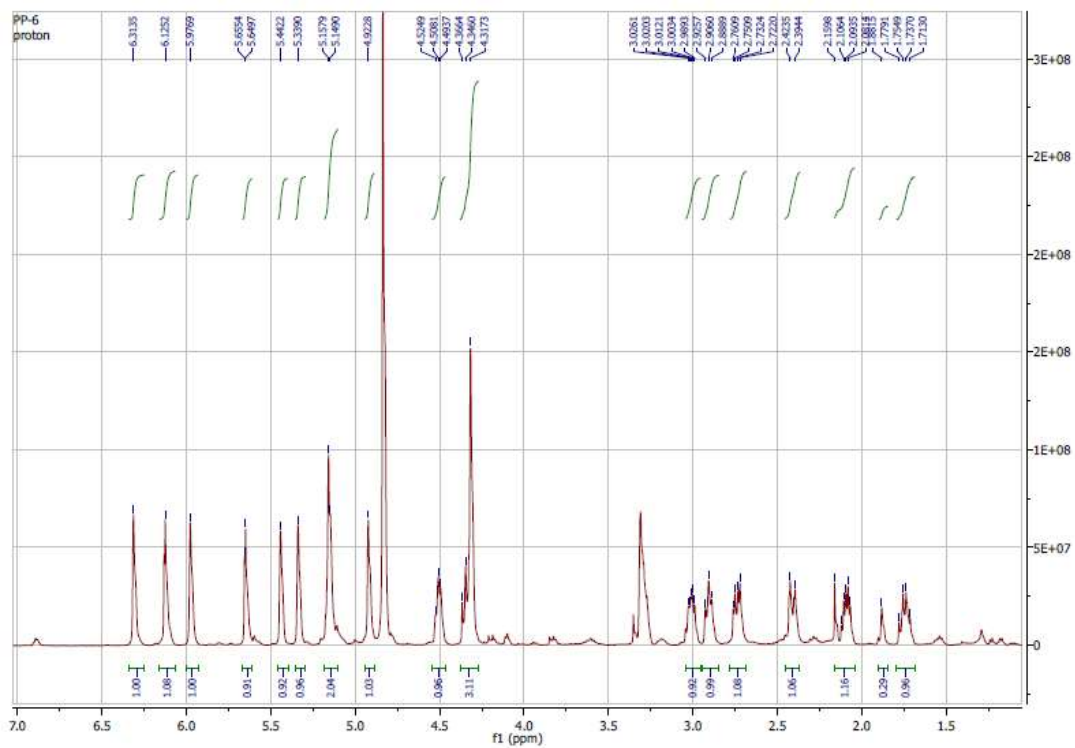

Figure S5. <sup>1</sup>H NMR spectrum of cynaropicrin (5) (500 MHz, MeOH-d<sub>4</sub>)

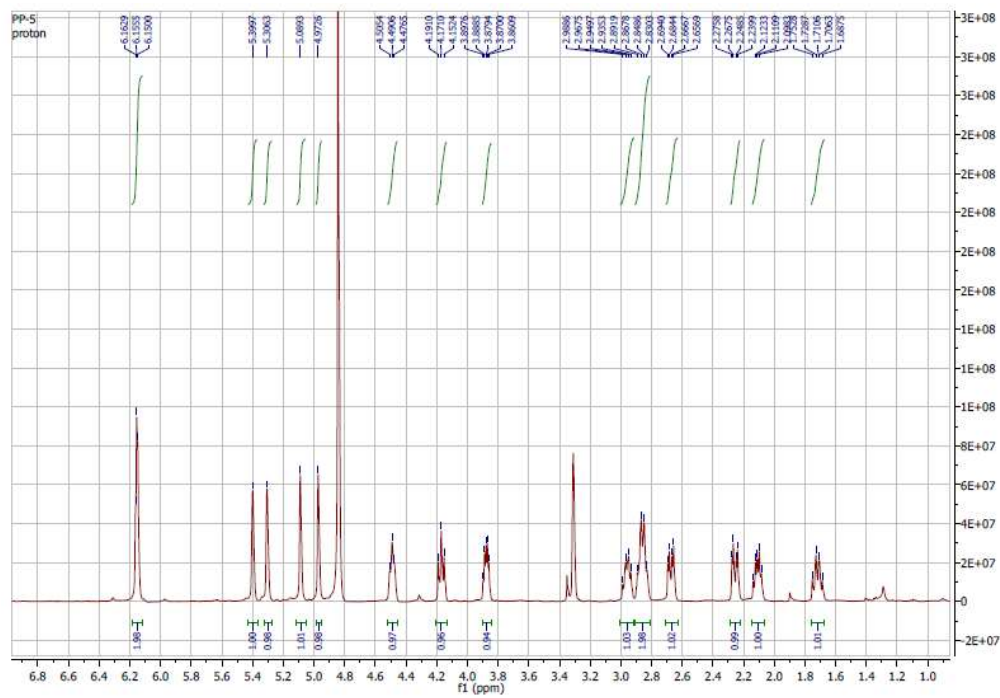

Figure S6. <sup>1</sup>H NMR spectrum of eleganin (6) (500 MHz, MeOH-d<sub>4</sub>)

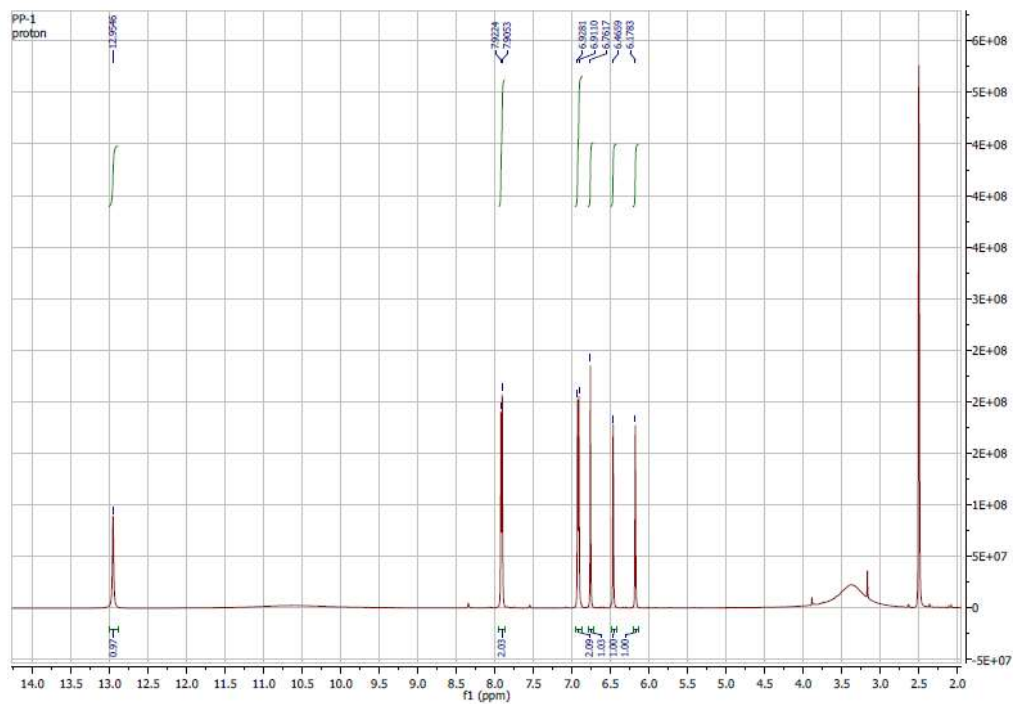

Figure S7.  $^1\text{H}$  NMR spectrum of apigenin (500 MHz,  $\text{MeOH-}d_4$ )

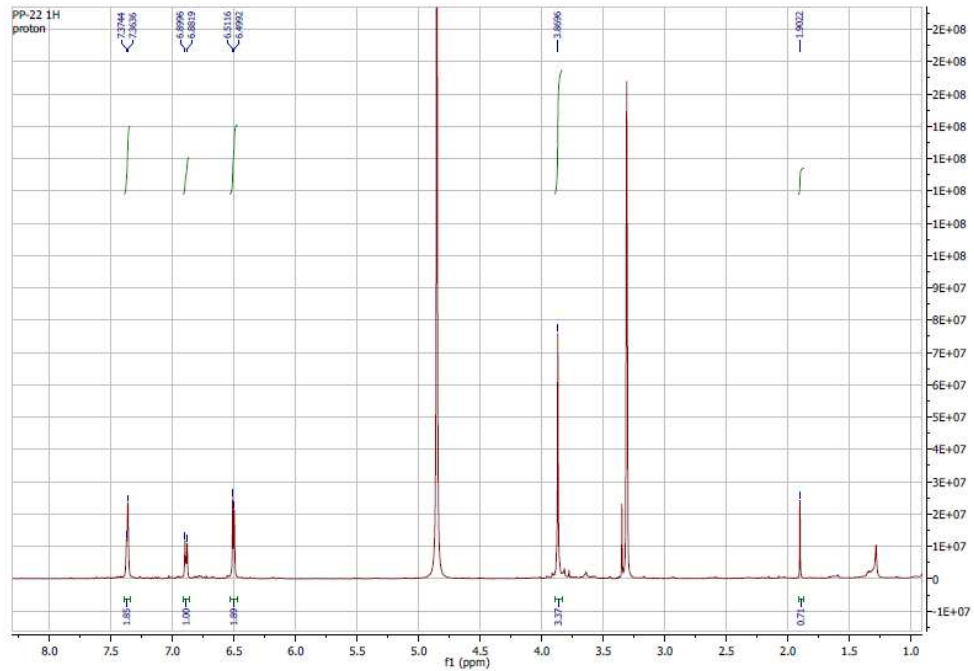

Figure S8.  $^1\text{H}$  NMR spectrum of 6-methoxyluteolin (500 MHz,  $\text{MeOH-}d_4$ )

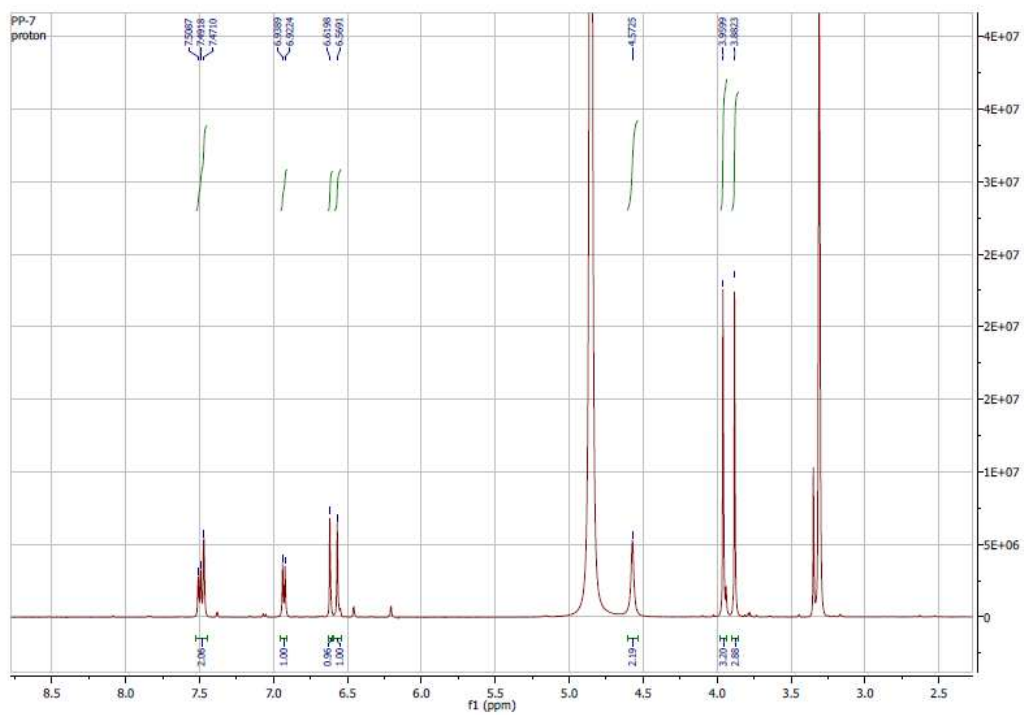

Figure S9.  $^1\text{H}$  NMR spectrum of jacosidine (500 MHz,  $\text{DMSO-}d_6$ )

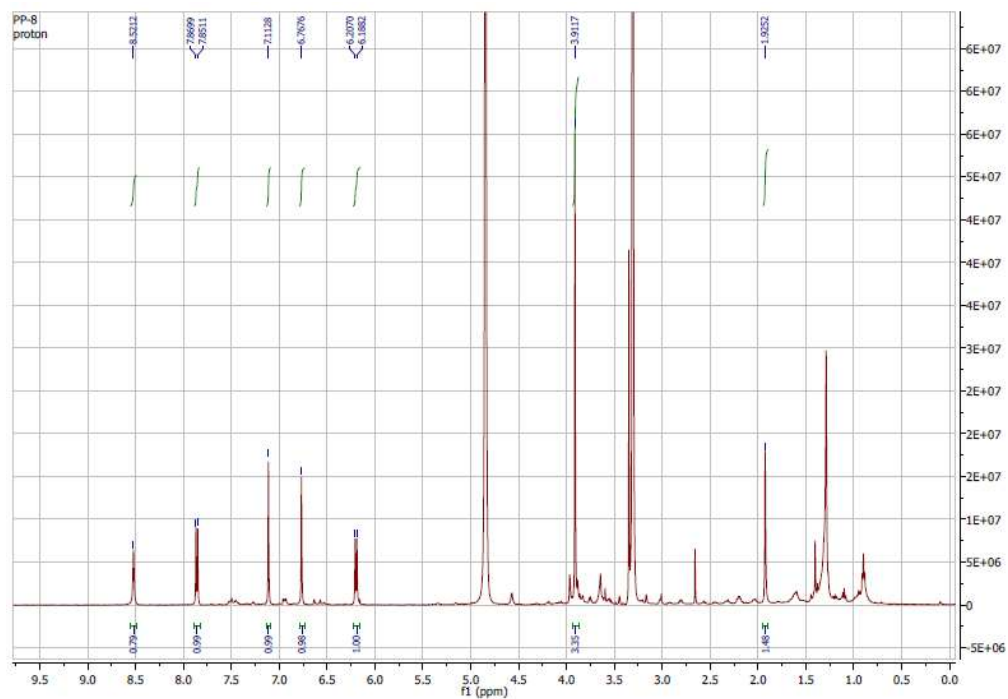

Figure S10.  $^1\text{H}$  NMR spectrum of scopoletin (500 MHz,  $\text{MeOH-}d_4$ )

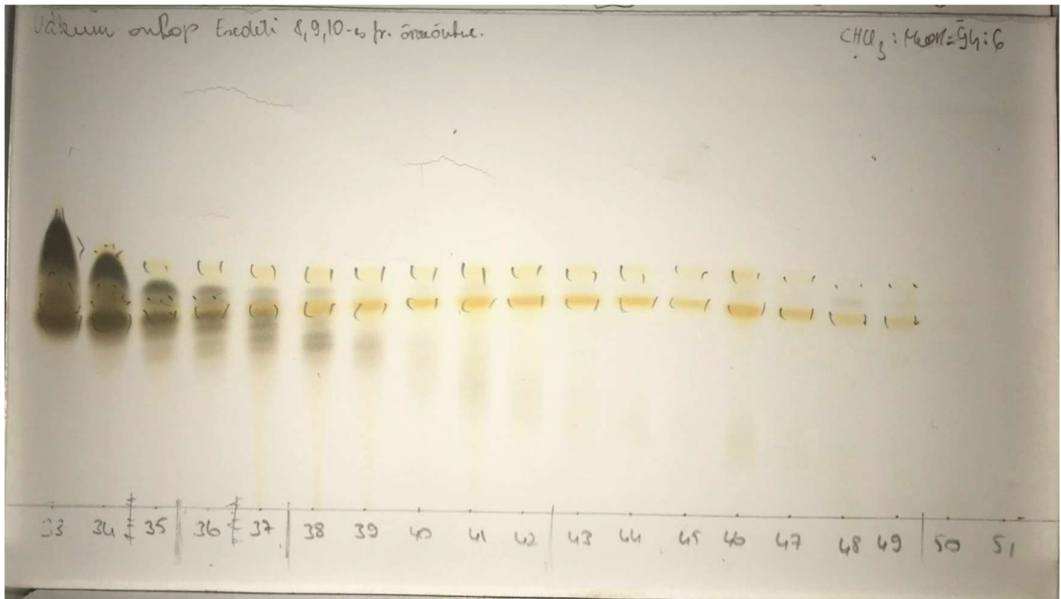

**Figure S11.** Separation of sesquiterpenoids (start points 1-5) and flavonoids (start points 6-17) by Sephadex LH-20 gel filtration of fraction C<sub>5</sub>. (Silica gel F<sub>254</sub>, developing system CHCl<sub>3</sub>:MeOH 94:6)

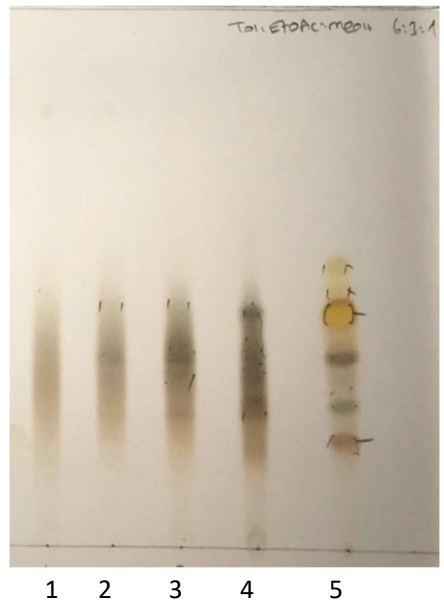

**Figure S12.** Separation by gel filtration of fraction D, subfraction II on Sephadex LH-20. (Silica gel F<sub>254</sub>, developing system toluene:EtOAc:MeOH 6:3:1)



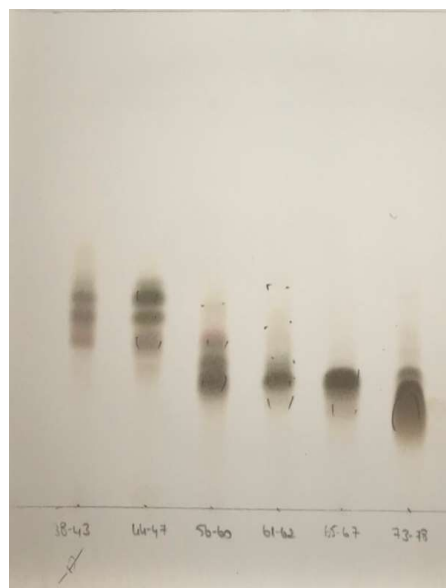

**Figure S13.** RPC fractionation of fraction D, subfraction II, gel filtration 3+4.  
(Silica gel F<sub>254</sub>, developing system toluene:EtOAc:MeOH 6:3:1).
